# Supplementary material for: Intestinal Absorption of Triterpenoids and Flavonoids from Glycyrrhizae radix et rhizoma in the Human Caco-2 Monolayer Cell Model
Source: PubMed Central journal article supplement (PMC6151599; doi:10.3390/molecules22101627), 2017-09-29
Supplement: molecules-22-01627-s001.pdf [file molecules-22-01627-s001.pdf]

## Supplementary Material:

### Intestinal Absorption of Triterpenoids and flavonoids from *Glycyrrhizae radix et rhizoma* in the Human Caco-2 Monolayer Cell Model

Xiao-Xue Wang, Gui-Yan Liu, Yan-Fang Yang, Xiu-Wen Wu, Wei Xu, Xiu-Wei Yang

**Table S1.** Regression data of compounds 2–7 and 9.

| Analytes | Standard curve         | R <sup>2</sup> | Linear range (μM) |
|----------|------------------------|----------------|-------------------|
| 2        | $y=16.5348x - 93.6358$ | 0.9980         | 5–200             |
| 3        | $y=30.360x - 25.134$   | 0.9990         | 2.5–50            |
| 4        | $y=0.6355x + 0.1744$   | 0.9990         | 5–75              |
| 5        | $y=20.4584x + 16.6306$ | 0.9990         | 2.5–75            |
| 6        | $y=7.19718x + 21.3983$ | 0.9980         | 5–150             |
| 7        | $y=19.6885x - 10.9668$ | 0.9990         | 10–200            |
| 9        | $y=56.2833x + 30.0455$ | 0.9990         | 5–200             |

**Table S2.** Precision, accuracy and recovery of compounds 2–7 and 9.

| Analytes | QC<br>μM | Precision (RSD %) |           | Accuracy  |           | Method recovery (%) |      |
|----------|----------|-------------------|-----------|-----------|-----------|---------------------|------|
|          |          | Intra-day         | Inter-day | Intra-day | Inter-day | Mean                | RSD  |
| 2        | 10       | 0.8               | 3.75      | 105.23    | 103.78    | 95.27               | 2.67 |
|          | 75       | 0.45              | 2.55      | 100.77    | 98.27     | 96.04               | 2.06 |
|          | 150      | 1.53              | 2.09      | 106.59    | 109.36    | 92.78               | 1.56 |
| 3        | 5        | 1.16              | 3.66      | 98.37     | 95.67     | 93.17               | 2.06 |
|          | 30       | 0.28              | 0.31      | 106.22    | 108.72    | 105.6               | 1.99 |
|          | 60       | 0.09              | 0.82      | 99.1      | 96.38     | 93.19               | 2.5  |
| 4        | 10       | 0.4               | 1.49      | 105.23    | 103.78    | 95.27               | 2.67 |
|          | 50       | 0.1               | 1.24      | 100.77    | 98.27     | 96.04               | 2.06 |
|          | 80       | 0.16              | 1.34      | 106.59    | 109.36    | 92.78               | 1.56 |
| 5        | 10       | 1.16              | 3.66      | 98.37     | 95.67     | 93.17               | 2.06 |
|          | 60       | 0.28              | 0.31      | 106.22    | 108.72    | 105.65              | 1.99 |
|          | 120      | 0.09              | 0.82      | 99.1      | 96.38     | 93.19               | 2.5  |
| 6        | 10       | 0.72              | 1.87      | 99.45     | 110.1     | 98.24               | 1.39 |
|          | 80       | 0.74              | 1.95      | 104.7     | 103.76    | 89.99               | 2.05 |
|          | 160      | 0.42              | 1.75      | 95.34     | 105.43    | 99.4                | 1.94 |
| 7        | 10       | 1.52              | 3.92      | 95.77     | 98.29     | 106.22              | 2.15 |
|          | 80       | 0.57              | 4.25      | 102.35    | 105.56    | 110.23              | 1.06 |
|          | 160      | 0.26              | 2.81      | 97.38     | 100.2     | 107.11              | 1.85 |
| 9        | 10       | 0.08              | 1.33      | 99.27     | 103.82    | 97.21               | 1.88 |
|          | 80       | 0.88              | 1.13      | 95.27     | 98.56     | 98.51               | 1.23 |
|          | 160      | 0.28              | 1.03      | 103.67    | 106.21    | 94.31               | 0.97 |

**Table S3.** The total recovery and the intracellular accumulation percentage of the assayed compounds 2–7 and 9 from the Caco-2 cell monolayer at the end of transport ( $n = 3$ ).

| Analytes | AP→BL                         |                   | BL→AP                         |                   |
|----------|-------------------------------|-------------------|-------------------------------|-------------------|
|          | Total recovery/% <sup>a</sup> | CA/% <sup>b</sup> | Total recovery/% <sup>a</sup> | CA/% <sup>b</sup> |
| 2        | 97.04 ± 0.36                  | –                 | 91.63 ± 1.27                  | –                 |
| 3        | 85.06 ± 2.33                  | 0.25 ± 0.01       | 98.24 ± 0.59                  | –                 |
| 4        | 81.88 ± 0.67                  | 50.52 ± 1.88      | 90.36 ± 2.74                  | 42.56 ± 2.36      |
| 5        | 96.2 ± 0.19                   | –                 | 94.53 ± 2.89                  | –                 |
| 6        | 97.52 ± 1.26                  | –                 | 96.13 ± 4.55                  | –                 |
| 7        | 96.88 ± 2.67                  | –                 | 97.71 ± 3.29                  | –                 |
| 9        | 87 ± 2.78                     | –                 | 94.79 ± 4.29                  | –                 |

<sup>a</sup>Total recovery: the percentage of the total amount of assayed compound recovered from both sides and intracellular accumulation in Caco-2 cell monolayer relative to the original amount; <sup>b</sup> CA (cell accumulation): the percentage of assayed compound that accumulated in the cell monolayer relative to the original amount.

–: not detected.
